# Supplementary material for: Comparison of Clinical Outcomes, Visual Quality and Visual Function of Two Presbyopia-Correcting Intraocular Lenses Made from the Same Material, but with Different Design and Optics
Source: MDPI journal article supplement (doi:10.3390/jcm10153268), 2021-07-24
Supplement: s1 [file s1]

**Supplementary Table S1.** Technical data of the two investigational devices.

|                                   | <b>Liberty 677PMY/677MTY</b>                            | <b>AT LISA tri 839MP/939MP</b>                         |
|-----------------------------------|---------------------------------------------------------|--------------------------------------------------------|
| Diffraction technology            | Diffraction trifocal up to 3.0 mm, thereafter monofocal | Diffraction trifocal up to 4.34 mm, thereafter bifocal |
| Diffraction steps                 | 7                                                       | 29                                                     |
| Diffraction orders                | 2 (order 0 and 1)                                       | 3 (order 0, 1 and 2)                                   |
| Diffraction surface               | anterior surface, Ø3.0 mm                               | anterior surface, Ø4.34 mm                             |
| Light loss (3.0 mm pupil)         | 11%                                                     | 14.3%                                                  |
| Light energy split (3.0 mm pupil) | 53%D/14%I/33%N                                          | 50%D/20%I/30%N                                         |
| Optic add powers (D)              | +1.75 D and +3.50 D                                     | +1.66 D and +3.33 D                                    |
| Toric available                   | Yes                                                     | Yes                                                    |
| Reading distance (cm)             | 37.5 cm                                                 | 40 cm                                                  |
| Aberration correction             | Aberration neutral                                      | -0.20 µm                                               |
| Lens material                     | Hydrophilic Acrylic (Benz-25)                           | Hydrophilic Acrylic (Benz-25)                          |
| Abbe-number                       | 58                                                      | 58                                                     |
| Refractive index                  | 1.46                                                    | 1.46                                                   |
| Filtration                        | UV and blue light (390-460 nm)                          | UV                                                     |
| Dioptric range                    | 0.0 D - +35.0 D                                         | 0.0 D - +32.0 D                                        |
| Optic/Haptic diameter             | 6.00 mm /13.0 mm                                        | 6.00 mm /11.0 mm                                       |
| Haptic design                     | Specific double loop                                    | Plate                                                  |
| Injection                         | Preloaded                                               | Preloaded                                              |

**Supplementary Table S2.** Demographic and preoperative characteristics of the study population.

| Demographic                      | Liberty 677PMY/677MTY            |               | AT LISA tri 839MP/939MP           |               | p= <sup>7</sup> |
|----------------------------------|----------------------------------|---------------|-----------------------------------|---------------|-----------------|
|                                  | Mean $\pm$ SD                    | Range         | Mean $\pm$ SD                     | Range         |                 |
| Age (years)                      | 56.0 $\pm$ 6.81                  | 47 - 69       | 51.0 $\pm$ 7.28                   | 52 - 75       | 0.0761          |
| Female/Male                      | 9 females (75%)<br>3 males (25%) |               | 12 females (75%)<br>4 males (25%) |               | >0.9999         |
| Axial length (AXL; mm)           | 23.05 $\pm$ 0.75                 | 21.99 - 24.46 | 23.14 $\pm$ 0.63                  | 22.28 - 24.29 | 0.6400          |
| Anterior chamber depth (ACD)     | 2.95 $\pm$ 0.22                  | 2.57 - 3.24   | 3.10 $\pm$ 0.41                   | 2.37 - 4.23   | 0.1130          |
| K1 (mm) <sup>1</sup>             | 7.89 $\pm$ 0.27                  | 7.45 - 8.52   | 7.88 $\pm$ 0.23                   | 7.42 - 8.37   | 0.7958          |
| K2 (mm) <sup>1</sup>             | 7.75 $\pm$ 0.29                  | 7.26 - 8.45   | 7.77 $\pm$ 0.22                   | 7.32 - 8.30   | 0.5903          |
| Corneal thickness ( $\mu$ m)     | 533.5 $\pm$ 19.67                | 508 - 569     | 565.4 $\pm$ 28.33                 | 513 - 627     | 0.6844          |
| Intraocular pressure (IOP; mmHg) | 16.67 $\pm$ 2.60                 | 13 - 23       | 16.03 $\pm$ 2.75                  | 10 - 21       | 0.3853          |
| Pupil size photopic (mm)         | 3.31 $\pm$ 1.50                  | 2.28 - 7.70   | 2.71 $\pm$ 0.48                   | 2.06 - 3.53   | 0.1749          |
| Pupil size mesopic (mm)          | 5.06 $\pm$ 1.20                  | 4.10 - 8.20   | N/A                               | N/A           | N/A             |
| Spherical error (SPH; D)         | 1.94 $\pm$ 0.96                  | 0.00 - +4.00  | 1.89 $\pm$ 1.68                   | -1.25 - +7.00 | 0.6148          |
| Cylindric error (Cyl; D)         | -0.49 $\pm$ 0.22                 | -1.00 - -0.25 | -0.45 $\pm$ 0.48                  | -1.50 - +0.50 | 0.7696          |
| Spherical equivalent (SEQ; D)    | 1.79 $\pm$ 0.95                  | -0.25 - +3.75 | 1.78 $\pm$ 0.77                   | -1.75 - +7.00 | 0.7041          |
| UDVA (logMAR) <sup>2</sup>       | 0.32 $\pm$ 0.17                  | 0.00 - 0.52   | 0.38 $\pm$ 0.27                   | 0.00 - 1.00   | 0.8137          |
| CDVA (logMAR) <sup>3</sup>       | 0.02 $\pm$ 0.05                  | 0.00 - 0.22   | 0.11 $\pm$ 0.22                   | 0.00 - 1.00   | 0.0226*         |
| UNVA (Jaeger) <sup>4</sup>       | 8.50 $\pm$ 2.52                  | 6 - 12        | N/A                               | N/A           | N/A             |
| CNVA (Jaeger) <sup>5</sup>       | 1.41 $\pm$ 0.73                  | 1 - 3         | 1.27 $\pm$ 0.63                   | 1 - 3         | 0.6053          |
| IOL power (SEQ; D) <sup>6</sup>  | 23.1 $\pm$ 2.01                  | 19.0 - 26.5   | 22.9 $\pm$ 2.47                   | 19.5 - 29.0   | 0.8173          |
| IOL cylinder (Cyl; D)            | 0.54 $\pm$ 0.62                  | 0.00 - 1.50   | 0.14 $\pm$ 0.39                   | 0.00 - 1.50   | 0.0049*         |

<sup>1</sup> Keratometry values<sup>2</sup> Uncorrected Distance Visual Acuity<sup>3</sup> Corrected Distance Visual Acuity<sup>4</sup> Uncorrected Near Visual Acuity<sup>5</sup> Corrected Near Visual Acuity<sup>6</sup> Intraocular Lens<sup>7</sup> p-values of the unpaired t-tests or Mann-Whitney test between the two study groups.P-values of  $\leq 0.05$  were considered as statistically significant (\*).

**Supplementary Table S3.** Optical quality assessment 12 months following IOL-implantation has shown that all examined parameters are comparable between the two IOL-subset of patients.

| Optical quality parametres       | Liberty 677PMY/677MTY |      |      |      | AT LISA tri 839MP/939MP |      |      |      | p=³    |
|----------------------------------|-----------------------|------|------|------|-------------------------|------|------|------|--------|
|                                  | Mean                  | SD   | Min  | Max  | Mean                    | SD   | Min  | Max  |        |
| <u>Month 3</u>                   |                       |      |      |      |                         |      |      |      |        |
| MTF cut-off                      | 32.3                  | 13.9 | 5.33 | 56.4 | 34.3                    | 10.5 | 14.4 | 54.8 | 0.5324 |
| Strehl-ratio                     | 0.20                  | 0.08 | 0.05 | 0.33 | 0.19                    | 0.07 | 0.09 | 0.35 | 0.6671 |
| OSI                              | 2.26                  | 1.36 | 0.00 | 5.17 | 1.60                    | 0.43 | 0.81 | 2.21 | 0.1061 |
| Tear-film OSI mean               | 2.44                  | 0.98 | 0.75 | 3.99 | 1.96                    | 0.65 | 0.92 | 2.79 | 0.1467 |
| Tear-film OSI standard deviation | 0.43                  | 0.35 | 0.05 | 0.23 | 0.33                    | 0.19 | 0.08 | 0.69 | 0.4002 |
| Tear-film OSI difference         | 1.60                  | 1.03 | 0.23 | 4.15 | 1.41                    | 0.85 | 0.34 | 2.65 | 0.5937 |
| <u>Month 12</u>                  |                       |      |      |      |                         |      |      |      |        |
| MTF cut-off                      | 34.5                  | 12.1 | 9.30 | 54.3 | 31.8                    | 11.9 | 12.9 | 56.2 | 0.2124 |
| Strehl-ratio                     | 0.20                  | 0.07 | 0.06 | 0.35 | 0.18                    | 0.08 | 0.09 | 0.36 | 0.1239 |
| OSI                              | 2.11                  | 1.62 | 0.00 | 6.71 | 2.03                    | 0.95 | 0.69 | 4.40 | 0.7901 |
| Tear-film OSI mean               | 1.96                  | 1.11 | 0.00 | 4.82 | 2.44                    | 0.96 | 1.12 | 5.38 | 0.0884 |
| Tear-film OSI standard deviation | 0.54                  | 0.74 | 0.00 | 2.92 | 0.40                    | 0.28 | 0.10 | 1.36 | 0.3404 |
| Tear-film OSI difference         | 2.79                  | 4.71 | 0.34 | 17.7 | 1.62                    | 0.96 | 0.45 | 4.92 | 0.1822 |

<sup>1</sup> Modular Transfer Function

<sup>2</sup> Objective Scatter Index

<sup>3</sup> p-values of the unpaired t-tests or Mann-Whitney test between the two study groups. P-values of  $\leq 0.05$  were considered as statistically significant (\*).

**Supplementary Table S4.** Visual function self-assessment questionnaire completed by the patients 12 months following IOL-implantation.

| A Visual Task Difficulty Assessment                                                    |                    |                       |                          |                       |                        |                     |
|----------------------------------------------------------------------------------------|--------------------|-----------------------|--------------------------|-----------------------|------------------------|---------------------|
| How much difficulty have you got with each of the following?                           |                    |                       |                          |                       |                        |                     |
|                                                                                        | 1 No<br>difficulty | 2 Minor<br>difficulty | 3 Moderate<br>difficulty | 4 Major<br>difficulty | 5 Cannot<br>accomplish | 6 Not<br>applicable |
| 1. Glare/Flare (trouble seeing street signs due to bright light or oncoming headlight) |                    |                       |                          |                       |                        |                     |
| 2. Night vision                                                                        |                    |                       |                          |                       |                        |                     |
| 3. Recognizing specific colors (color perception)                                      |                    |                       |                          |                       |                        |                     |
| 4. Rings around light sources (halos)                                                  |                    |                       |                          |                       |                        |                     |
| 5. Lining things up, pouring liquids or going down stairs (depth perception)           |                    |                       |                          |                       |                        |                     |
| 6. Straight lines look crooked close up (distorted near vision)                        |                    |                       |                          |                       |                        |                     |
| 7. Straight lines look crooked at distance (distorted far vision)                      |                    |                       |                          |                       |                        |                     |
| 8. Blurred near vision                                                                 |                    |                       |                          |                       |                        |                     |
| 9. Blurred far vision                                                                  |                    |                       |                          |                       |                        |                     |
| 10. Double vision                                                                      |                    |                       |                          |                       |                        |                     |

  

| B Visual Lifestyle Activities                                                                                                          |                    |                       |                          |                       |                        |                     |
|----------------------------------------------------------------------------------------------------------------------------------------|--------------------|-----------------------|--------------------------|-----------------------|------------------------|---------------------|
| How much difficulty have you got with each of the following activities due to your vision (without your spectacle sor contact lenses)? |                    |                       |                          |                       |                        |                     |
|                                                                                                                                        | 1 No<br>difficulty | 2 Minor<br>difficulty | 3 Moderate<br>difficulty | 4 Major<br>difficulty | 5 Cannot<br>accomplish | 6 Not<br>applicable |
| 1. Watching TV or movies                                                                                                               |                    |                       |                          |                       |                        |                     |
| 2. Playing or working outdoors                                                                                                         |                    |                       |                          |                       |                        |                     |
| 3. Caring for/playing with children                                                                                                    |                    |                       |                          |                       |                        |                     |
| 4. Reading the time on an alarm clock                                                                                                  |                    |                       |                          |                       |                        |                     |
| 5. Seeing clearly when waking up                                                                                                       |                    |                       |                          |                       |                        |                     |
| 6. Performing your job / hobbies                                                                                                       |                    |                       |                          |                       |                        |                     |
| 7. Participating in sports or other recreational activities                                                                            |                    |                       |                          |                       |                        |                     |
| 8. Participating in social events                                                                                                      |                    |                       |                          |                       |                        |                     |
| 9. Reading and near work activities                                                                                                    |                    |                       |                          |                       |                        |                     |
| 10. Driving at night                                                                                                                   |                    |                       |                          |                       |                        |                     |
| 11. Driving when it is raining                                                                                                         |                    |                       |                          |                       |                        |                     |
| 12. Using a computer                                                                                                                   |                    |                       |                          |                       |                        |                     |
| 13. Cooking                                                                                                                            |                    |                       |                          |                       |                        |                     |
| 14. Shopping                                                                                                                           |                    |                       |                          |                       |                        |                     |
| 15. Using a cell phone                                                                                                                 |                    |                       |                          |                       |                        |                     |
| 16. Shaving / putting on make-up                                                                                                       |                    |                       |                          |                       |                        |                     |

  

| C Spectacle use                                    |          |         |          |        |         |
|----------------------------------------------------|----------|---------|----------|--------|---------|
| How often do you use spectacles or contact lenses? |          |         |          |        |         |
|                                                    | 1 Always | 2 Often | 3 Seldom | 4 Rare | 5 Never |
| 1. For distance vision                             |          |         |          |        |         |
| 2. For intermediate vision                         |          |         |          |        |         |
| 3. For near vision                                 |          |         |          |        |         |

  

| D Overall satisfaction                                                                                              |  |
|---------------------------------------------------------------------------------------------------------------------|--|
| How much satisfied are you with your current vision on a scale from 1 to 10 (1=at least; 10= maximum satisfaction)? |  |
|                                                                                                                     |  |

**Supplementary Table S5.** Visual function self-assessment of the patients 12 months following IOL-implantation.

| Visual function items              | Liberty 677PMY/677MTY |       |     |     | AT LISA tri 839MP/939MP |       |     |     | p <sup>1</sup> |
|------------------------------------|-----------------------|-------|-----|-----|-------------------------|-------|-----|-----|----------------|
|                                    | Mean                  | SD    | Min | Max | Mean                    | SD    | Min | Max |                |
| Glare/Flare                        | 2.22                  | 1.09  | 1   | 4   | 2.29                    | 1.07  | 1   | 4   | >0.9999        |
| Night vision                       | 2.11                  | 0.78  | 1   | 3   | 1.86                    | 0.53  | 1   | 3   | 0.8466         |
| Color perception                   | 1.11                  | 0.33  | 1   | 2   | 1.00                    | 0.00  | 1   | 1   | >0.9999        |
| Halos                              | 2.75                  | 0.89  | 1   | 4   | 2.21                    | 0.89  | 1   | 4   | 0.4118         |
| Depth perception                   | 1.11                  | 0.33  | 1   | 2   | 1.14                    | 0.36  | 1   | 2   | >0.9999        |
| Distorted near vision              | 1.00                  | 0.00  | 1   | 1   | 1.14                    | 0.36  | 1   | 2   | 0.9999         |
| Distorted far vision               | 1.00                  | 0.00  | 1   | 1   | 1.46                    | 0.88  | 1   | 4   | 0.6952         |
| Blurred near vision                | 1.11                  | 0.33  | 1   | 2   | 1.54                    | 0.78  | 1   | 3   | 0.8212         |
| Blurred far vision                 | 1.33                  | 0.71  | 1   | 3   | 2.15                    | 1.21  | 1   | 5   | 0.3836         |
| Double vision                      | 1.00                  | 0.00  | 1   | 1   | 1.38                    | 0.77  | 1   | 3   | 0.9396         |
| Watching TV/movies                 | 1.11                  | 0.33  | 1   | 2   | 1.29                    | 0.61  | 1   | 3   | >0.9999        |
| Playing or working outside         | 1.00                  | 0.00  | 1   | 1   | 1.21                    | 0.58  | 1   | 3   | 0.9999         |
| Caring for / playing with children | 1.00                  | 0.00  | 1   | 1   | 1.07                    | 0.27  | 1   | 2   | >0.9999        |
| Reading the time on an alarm clock | 1.11                  | 0.33  | 1   | 2   | 1.21                    | 0.43  | 1   | 2   | >0.9999        |
| Seeing clearly when waking up      | 1.56                  | 0.53  | 1   | 2   | 1.50                    | 0.65  | 1   | 3   | >0.9999        |
| Reading the time on a wall clock   | 1.00                  | 0.00  | 1   | 1   | 1.07                    | 0.27  | 1   | 2   | >0.9999        |
| Performing job/hobbies             | 1.00                  | 0.00  | 1   | 1   | 1.14                    | 0.36  | 1   | 2   | 0.9999         |
| Participating in sports/recreation | 1.00                  | 0.00  | 1   | 1   | 1.14                    | 0.36  | 1   | 2   | 0.9999         |
| Participating in social events     | 1.00                  | 0.00  | 1   | 1   | 1.00                    | 0.00  | 1   | 1   | >0.9999        |
| Reading or near work activities    | 1.33                  | 0.71  | 1   | 3   | 1.21                    | 0.58  | 1   | 3   | >0.9999        |
| Driving at night                   | 2.63                  | 0.92  | 1   | 4   | 2.10                    | 0.57  | 1   | 3   | 0.1448         |
| Driving when it is raining         | 2.50                  | 0.76  | 2   | 4   | 1.90                    | 0.74  | 1   | 3   | 0.2986         |
| Using a computer                   | 1.89                  | 0.93  | 1   | 3   | 1.46                    | 0.78  | 1   | 3   | 0.8995         |
| Cooking                            | 1.00                  | 0.00  | 1   | 1   | 1.21                    | 0.58  | 1   | 3   | 0.9999         |
| Shopping                           | 1.00                  | 0.00  | 1   | 1   | 1.07                    | 0.27  | 1   | 2   | >0.9999        |
| Using a cell phone                 | 1.11                  | 0.33  | 1   | 2   | 1.00                    | 0.00  | 1   | 1   | >0.9999        |
| Shaving / Putting on make up       | 1.22                  | 0.67  | 1   | 3   | 1.21                    | 0.58  | 1   | 3   | >0.9999        |
| Spectacle use - Distance           | 5                     | 0     | 5   | 5   | 4.86                    | 0.363 | 4   | 5   | 0.9999         |
| Spectacle use - Intermediate       | 4.778                 | 0.667 | 3   | 5   | 4.71                    | 1.069 | 1   | 5   | >0.9999        |
| Spectacle use - Near               | 5                     | 0     | 5   | 5   | 4.71                    | 1.069 | 1   | 5   | >0.9999        |
| Overall satisfaction               | 9.39                  | 0.70  | 8   | 10  | 8.86                    | 1.99  | 4   | 10  | 0.9823         |

<sup>1</sup> p-values of the unpaired t-tests or Mann-Whitney test between the two study groups. P-values of  $\leq 0.05$  were considered as statistically significant (\*).
